# Supplementary material
Source: publisher figshare collection journal article supplement (https://tandf.figshare.com/ndownloader/files/20025041)
Supplement: Supplementary file 1 [file 20025041]

| **Supplementary Table 1. Standard full economic cost price per visit in the Netherlands in 2014.** | | | | | | |
| --- | --- | --- | --- | --- | --- | --- |
| **Health care**  *Outpatient mental health service* | | | | | **EUR** |
|  |
|  | | | Psychiatrist | | 112.00 |
|  | | | Psychiatric social nurse | | 73.00 |
|  | | | Psychologist/psychotherapist | | 112.00 |
|  | | | Social work, including  individual placement and support | | 65.00 |
|  | | | Psychiatric home care | | 23.00 |
| *Inpatient mental health service* | | | | |  |
|  | | | | General costs (per day) | 302.00 |
|  | | | | Psychiatrist | 112.00 |
|  | | | | Psychologist | 112.00 |
| *Self-employed* | | | | |  |
|  | | | | Psychiatrist, psychologist/psychotherapist | 94.44 |
| *Medical non-mental health care* | | | | |  |
|  | General practitioner/family doctor | | | | 33.00 |
|  | Occupational medicine physician | | | | 33.00 |
|  | Occupational social work | | | | 65.00 |
|  | Medical specialist in general hospital | | | | 47.00 |
|  | | Medical specialist in academic hospital | | | 86.00 |
|  | | Other visits to general/academic hospital | | | 33.00 |
|  | | Paramedical care (e.g. physiotherapist, dietician) | | | 33.00 |
| *General* | | | | |  |
| District nurse | | | | | 73.00 |
| Alternative medicine | | | | | 23.00 |
| Professional home care | | | | | 23.00 |
| Informal care (family and peers) | | | | | 14.00 |
| Self-help group | | | | | 14.00 |
| *Out-of-pocket costs* *(transport)* | | | | |  |
|  | | | Per kilometer | | 0.19 |
|  | | | Parking per visit | | 3.00 |
| **Productivity loss** | | | | |  |
| Work absenteeism/presenteeism per hour | | | | | 34.75 |
| Domestic absenteeism/presenteeism per hour | | | | | 14.00 |
